# Supplementary material
Source: publisher site journal article supplement (https://zse.pensoft.net/article/76940/download/suppl/31/)
Supplement: Supplementary file 1

## Sheet: Data
Collection	Catalog no	Genus	Species	Country	Locality	Collector	Collection date	Sex	GL (mm)	CBL (mm)	CCL (mm)	MT (mm)	ZW (mm)	C1H (mm)	BL (mm)	BW (mm)	Note
Naturalis Biodiversity Center, Leiden	RMNH.MAM.59688.a	Prionailurus	Diard's	Singapore	NA	Diard	1819	NA	133.67	122.91	116.77	40.75	86.05	20.07	24.9	14.82	young adult
Naturalis Biodiversity Center, Leiden	RMNH.MAM.20311	Prionailurus	viverrinus	Indonesia	West-Java	Jacobson, E.	1938	F	124.34	115.35	109.01	35.11	79.22	17.37	23.58	14.37
Naturalis Biodiversity Center, Leiden	RMNH.MAM.1701	Prionailurus	viverrinus	Indonesia	Java	Zoologisch Museum Buitenzorg	January 1924	M	133.98	124.23	116.87	39.43	85.41	18.59	25.85	14.28
Naturalis Biodiversity Center, Leiden	ZMA.MAM.9676	Prionailurus	viverrinus	Indonesia	Java, sugarplantation Kali Woengo	Lewis, P.D.	wildcaught, but died in captivity on 29-12-1934	M	136.09	122.48	116.31	39.36	89.8	19.27	25.43	14.73
Naturalis Biodiversity Center, Leiden	ZMA.MAM.2306	Prionailurus	viverrinus	from captivity		Amsterdam Zoo, Artis	1956-04-26	F	133.1	122.32	115.23	40.18	84.37	14.41	28.75	17.78
Zoological Reference Collection of Lee Kong Chian Natural History Museum, National University of Singapore	ZRC 4.1007	Prionailurus	viverrinus	Thailand	Pakchong	J.H. Chambai	24-***-1924	M	146.7	136.4	129.3	46.5	93.1	20.5	31.9	18.2	adult
Zoological Reference Collection of Lee Kong Chian Natural History Museum, National University of Singapore	ZRC 4.1008	Prionailurus	viverrinus	Thailand	Raheng (Tak)	K.G. Gairdner	1924-07-12	M	147.7	135.7	129.7	46	97.8	21.7	31.4	18.3	adult
Zoological Reference Collection of Lee Kong Chian Natural History Museum, National University of Singapore	ZRC. 4.1015	Prionailurus	bengalensis	Malaysia	Kuala Kangsar, Perak	NA	1908-05-23	M	92.4	82.9	79.3	28.2	62.9	12.7	21.5	13.8	adult
Zoological Reference Collection of Lee Kong Chian Natural History Museum, National University of Singapore	ZRC. 4.1019	Prionailurus	bengalensis	Malaysia	Gap, Pahang	A.Pins.Vindargori	1916-01-05	F	91.5	84.5	79.6	27.6	61.7	10.5	22.3	13	adult
Zoological Reference Collection of Lee Kong Chian Natural History Museum, National University of Singapore	ZRC. 4.1024	Prionailurus	bengalensis	Malaysia	Selangor	NA	1917-07-24	F	88	82.6	78.2	27.6	61	10.4	20.3	12.1	adult
Zoological Reference Collection of Lee Kong Chian Natural History Museum, National University of Singapore	ZRC. 4.1026	Prionailurus	bengalensis	Malaysia	Seremban, Negri Sembilan	NA	1912-08-28	M	93	84.4	80	29.1	60.5	11.9	21.4	13.3	young adult
Zoological Reference Collection of Lee Kong Chian Natural History Museum, National University of Singapore	ZRC. 4.1028	Prionailurus	bengalensis	Malaysia	Alor Gajah, Malacca	NA	**-Sep-1933	NA	90.2	84.4	80.2	28.5	60	11.2	20.6	13	adult
Zoological Reference Collection of Lee Kong Chian Natural History Museum, National University of Singapore	ZRC. 4.1029	Prionailurus	bengalensis	Malaysia	Alor Gajah, Malacca	NA	**-Sep-1933	M	95.5	88.3	83.3	29.4	-	11.3	21.5	13.1	adult
Zoological Reference Collection of Lee Kong Chian Natural History Museum, National University of Singapore	ZRC. 4.1031	Prionailurus	bengalensis	Malaysia	Pulau Tinggi, Johor	NA	1917-07-24	NA	81.9	77.1	74	28.2	56	10.7	20.4	13.8	young adult
Zoological Reference Collection of Lee Kong Chian Natural History Museum, National University of Singapore	ZRC. 4.1032	Prionailurus	bengalensis	Malaysia	Johor	NA	1933-01-03	M	88.6	82	77	27	58.7	10.7	20.7	13.2	adult
Zoological Reference Collection of Lee Kong Chian Natural History Museum, National University of Singapore	ZRC. 4.1034	Prionailurus	bengalensis	Singapore	Seletar bungalow, Singapore	J.A.Jansen (pres)	1921-09-09	F	90.1	84.1	79.2	27.3	58.3	10.6	22.4	13.3	adult

## Sheet: PCA loading matrix
	PC1	PC2
GL	-0.379	-0.0145
CBL	-0.373	0.0131
CCL	-0.374	0.00646
MT	-0.351	0.154
ZW	-0.351	-0.0429
C1H	-0.485	-0.583
BL	-0.244	0.529
BW	-0.189	0.595
Proportion of variance	0.9574	0.02853
